# Supplementary figures and images for: Biological Evaluation of the Osteoinductive Potential of Dry Teeth after Chemical Demineralization Treatment Using the Tooth Transformer Device
Source: MDPI journal article supplement (doi:10.3390/biom13121727), 2023-11-30

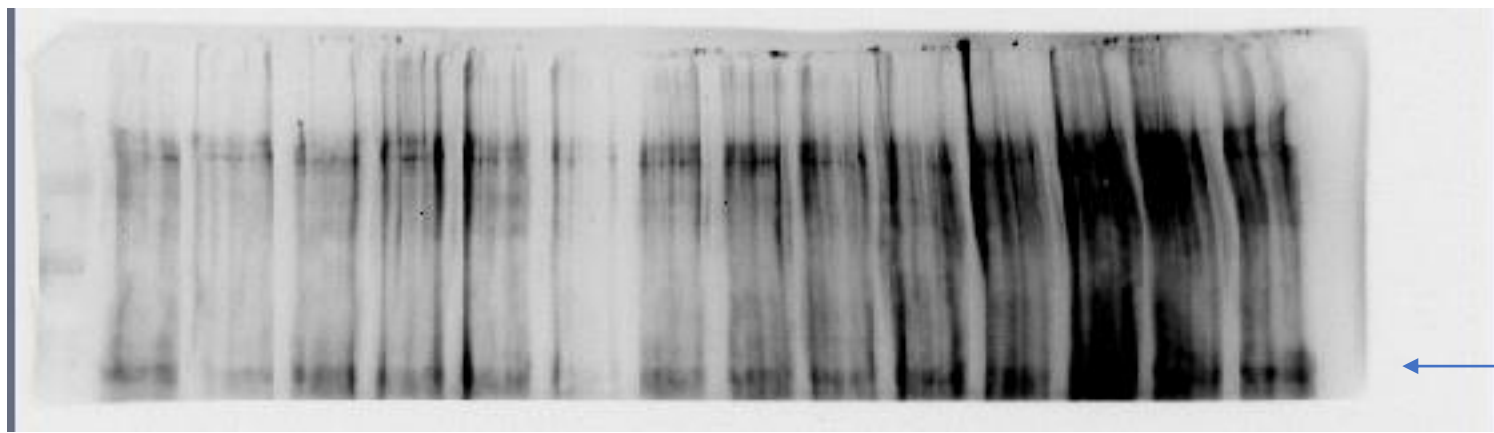

LMP 1

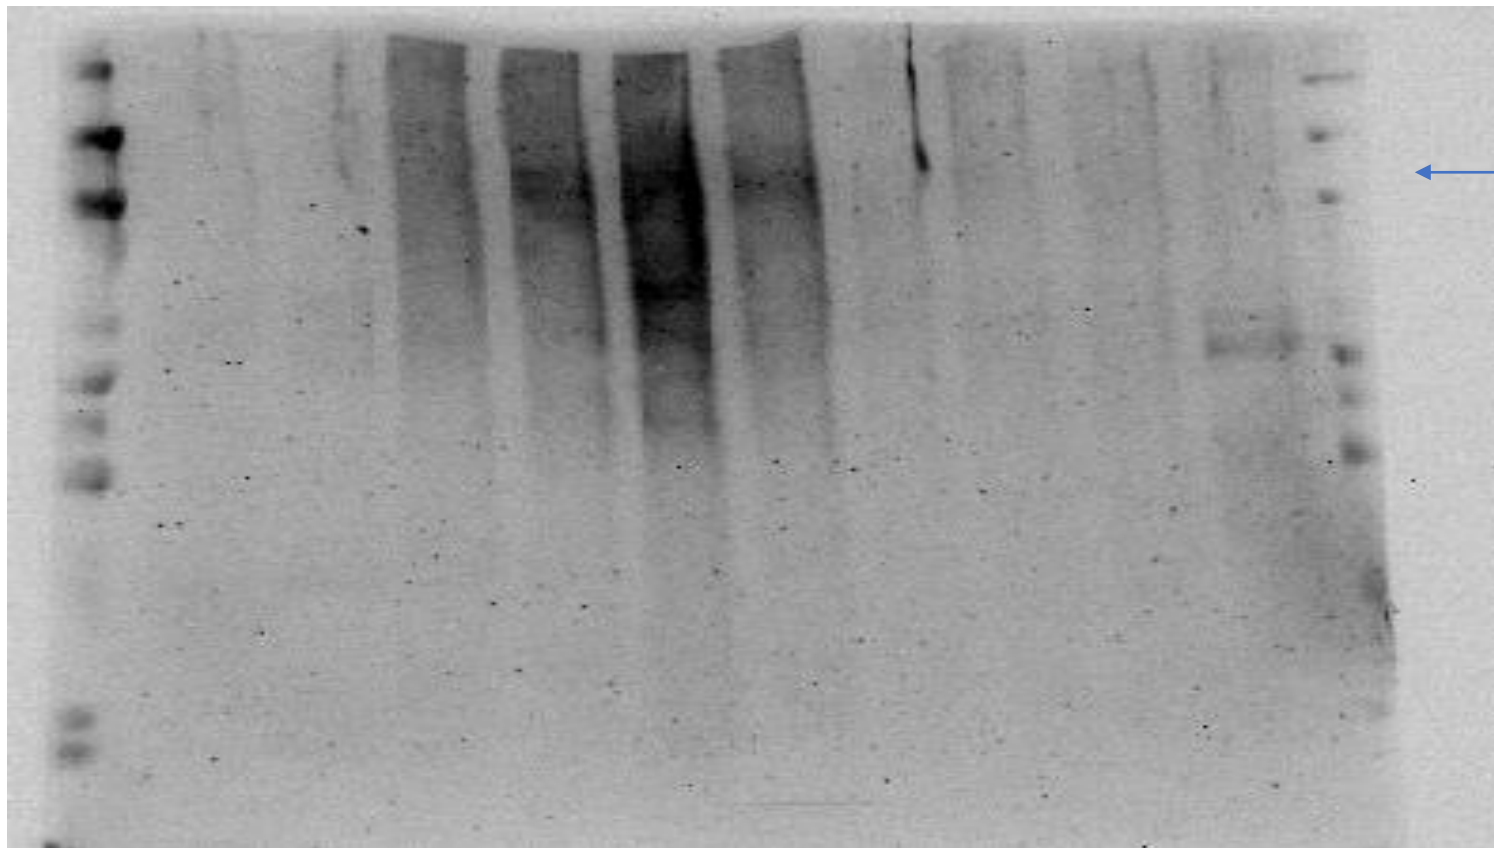

TGF- $\beta$

Figure S1: Original images of Figure 2.

Supplement: s1 [file s1]
